# Supplementary material
Source: Elsevier journal article supplement (https://rcastoragev2.blob.core.windows.net/65b8ef68ae81c5ffdbe8ccdbcde5a120/mmc1.pdf)

# ZScores distribution in Confirmation Run

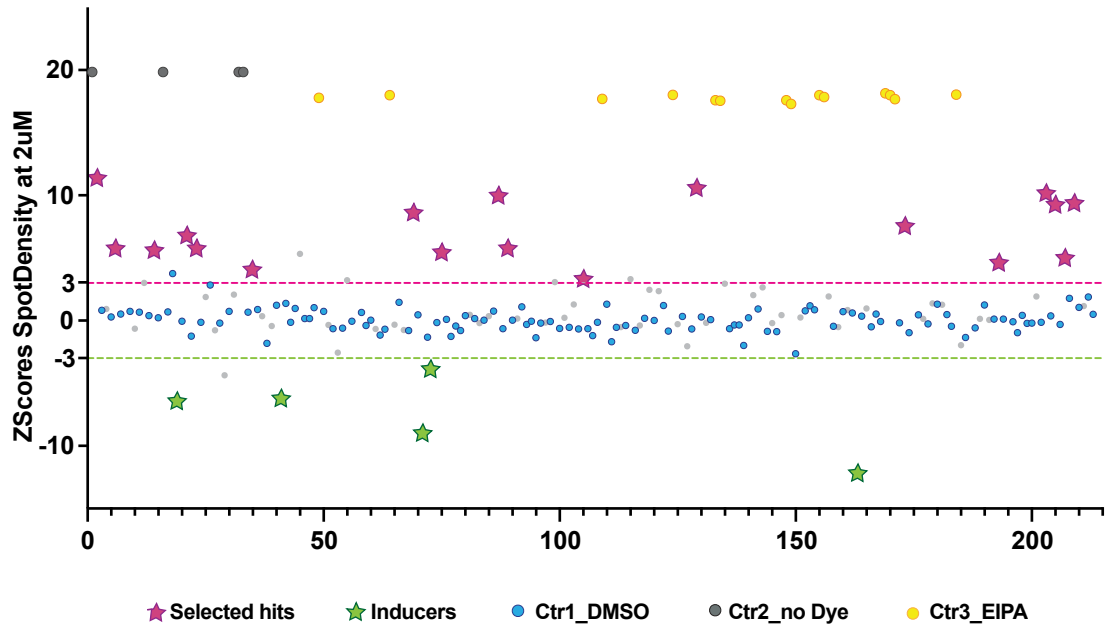

Supplement: mmc1 [file mmc1.pdf]
